# Supplementary material for: High-resolution mapping reveals hundreds of genetic incompatibilities in hybridizing fish species
Source: eLife. 2014 Jun 4;3:e02535. doi: 10.7554/eLife.02535 (PMC4080447; doi:10.7554/eLife.02535)
Supplement: Supplementary file 1. — (A) Pairs of regions in significant linkage disequilibrium (FDR 5%). (B) Pairs of LD regions (FDR 5%) that have single-gene resolution. (C) Divergence analysis for full data set including pairs heterospecific in one or both populations. DOI: http://dx.doi.org/10.7554/eLife.02535.022 [file elife02535s001.xls]

## Sheet: Table S1A
Table S1A. Pairs of regions in significant linkage disequlibrium (FDR 5%)
LG 1	Start coordinate	End coordinate	LG 2	Start coordinate	End coordinate
1	17336118	17352508	3	25372521	25372521
1	9041150	14027379	4	8202830	8276795
1	22655822	22666726	4	23314998	23356384
1	27979362	28160521	4	25609528	25693013
1	16760177	16780005	5	14471066	14488287
1	10709652	14111741	6	13140519	13214551
1	11859270	11872584	6	13991153	13991153
1	16129743	16304529	7	26461649	26672342
1	1394132	9104793	8	10091645	10163420
1	17336118	23141431	9	2826444	2868419
1	14020485	14056751	10	7191819	7243591
1	9410180	9418996	11	1433236	1436284
1	15121937	15121937	11	1546686	1546686
1	15017287	15018908	11	24391642	24391642
1	9410180	9410180	12	3047636	3048351
1	16218433	16286890	13	21485004	21485004
1	9159868	9162521	15	10465666	10509594
1	14020485	14111741	15	22416221	22880189
1	9159868	15354910	16	11844740	12011464
1	11475203	11504678	16	14751151	14825511
1	11848350	23031051	17	1915768	2261043
1	14504941	14506872	17	9221233	9222588
1	14056751	16306957	18	21424222	26345526
1	9204755	9418996	19	10052237	10455880
1	22535041	22535041	20	14395952	14398318
1	9159868	14032450	21	540806	1634470
1	9002900	9104793	22	8890935	8965609
1	14031125	14100412	22	13899590	13931721
2	25593039	25603580	3	276700	323308
2	263560	279044	3	7452570	7452570
2	11167393	11207666	3	29122080	29131143
2	12220711	12228460	4	13546117	13568067
2	1040121	1315557	4	16899566	16964555
2	24595178	24633975	4	21233317	21236027
2	23855209	23855209	4	26179659	26182382
2	25543275	25546544	5	10308042	10321919
2	11636398	11639464	5	10783094	10784698
2	12400386	12441032	5	20161740	20162582
2	25297281	25370064	5	30387362	30478150
2	14059617	14059617	6	13134404	13134404
2	11487618	11622125	6	13877262	13897996
2	9747837	9751240	7	17452941	17467711
2	25237409	25252918	11	1191424	1297746
2	9730811	16093705	11	21825197	21872867
2	21603270	21604670	12	14886563	14904124
2	1959094	1972622	15	19221963	19223718
2	9551264	9731714	16	24262149	24495144
2	11432685	11794935	17	2261043	2272099
2	21603270	25603580	20	14395952	17140805
2	23788489	23805274	20	19109172	19219654
2	1908372	2008638	21	1042069	1634470
2	21603270	21603270	22	14127266	14157951
2	10849465	10849465	22	14667642	14673498
2	11670498	11670498	23	2051281	2052983
3	17449491	17449491	4	1482148	1486970
3	7340111	7340111	4	1716383	1721173
3	11880143	11888259	4	17570456	17570456
3	17648889	17727938	4	19237112	19370548
3	6569361	6569523	5	10522548	10522548
3	26346922	26372340	5	24797730	24889402
3	23905276	23927606	5	30285219	30617226
3	7340111	7518742	6	12985663	13004660
3	695789	11947610	6	13148414	14480297
3	17429812	25326513	8	10065677	10118233
3	11800329	11886613	9	9432419	9436826
3	23909958	23909958	9	11147119	11148048
3	17727938	17783407	9	17476911	17478089
3	15783050	29270931	10	11130931	16715367
3	28837287	29172219	12	18514565	18581397
3	701958	1330571	13	7657517	22541483
3	28028883	28066693	13	25652691	25792205
3	6569361	7379626	15	21942895	22326461
3	17661368	17666616	16	1990558	1990558
3	25326513	25372521	16	5105054	12305996
3	6603151	6603411	17	1885375	2226585
3	9936216	9936272	18	2279670	2279670
3	6569361	6586029	18	13072974	13160335
3	11791932	28100138	20	1678052	2559548
3	17386732	17386811	21	2839271	2868729
3	15783050	15801784	21	4535148	4546412
3	25372521	25372521	22	27558163	27558163
3	6569361	11512487	23	9548411	22907627
3	13177197	13180040	23	24930770	24962253
4	21236027	21395335	5	16931217	17062162
4	16943225	16964555	6	14472370	14530448
4	13711466	13711466	7	15357929	15368356
4	1766268	2014333	8	10895228	10915008
4	1692081	1709066	9	2826444	2827620
4	8314011	8328433	9	3449644	3453723
4	25337923	25356103	9	15198701	15199433
4	19174050	19181303	11	20590225	20594765
4	180699	18799751	12	3137634	3283393
4	25119815	25130537	13	7590601	7590601
4	1672192	1680173	13	11650338	11723739
4	26142510	26171029	13	24505076	24576936
4	8302322	13948758	15	22283344	22291461
4	12529064	24902258	17	1942483	2035638
4	1921711	1969636	17	2226585	2261043
4	11234348	11234348	18	17282642	17302940
4	13940194	13948758	18	26286966	26294885
4	26088830	26088830	20	4006412	4006412
4	25942921	25942921	20	6030189	6079344
4	23284323	23284323	20	14481624	14509117
4	26164477	26183594	20	16776052	16830666
4	17296452	17544197	21	90370	2868729
4	1967138	14109057	22	10938214	11108388
4	8202830	25693013	23	295725	2865971
4	13940194	13968299	23	9771788	9771788
5	2877174	2877259	6	10665425	10665425
5	10308042	10522548	6	13660319	13681283
5	31195531	31356977	6	15637418	15647097
5	16931217	16931217	6	17470397	17476451
5	25200564	25277535	7	4109257	26681591
5	20161740	20162582	8	11173118	11173118
5	24843831	24844314	8	13436390	13448570
5	14885069	14885069	8	15596244	15596744
5	2875251	24812827	9	2906523	3453723
5	10308042	10309582	9	20428135	20461775
5	30472086	30510695	9	23220027	23224888
5	25200564	30532210	11	21825197	21872867
5	25200564	25206309	11	25358300	25358300
5	30357882	30357885	12	7307282	7314774
5	14028531	28918986	12	23853759	23930688
5	13854984	13854984	13	1570379	1582080
5	34962	59866	13	7657517	7658396
5	30286391	30718453	13	21485004	24576936
5	25200564	25271407	14	3708085	3733021
5	10783094	10784166	15	20797030	20815009
5	2808709	2877259	15	22067487	22067487
5	10643095	10677821	15	22283344	22332596
5	19260572	19272336	18	4762823	4786778
5	20161740	20162582	18	17430190	17430190
5	25200564	25213429	18	25995706	26044956
5	28863755	28874792	20	15215308	15226492
5	16940482	16940482	20	20045588	20047448
5	24621971	24647190	21	3596746	3603564
5	30387362	30388585	22	14077895	14085043
5	15471198	15471198	24	5047925	5047925
6	14234379	14234379	8	10101781	10144990
6	9921529	10078395	9	17194539	17199902
6	10036343	10050251	10	16736864	16748825
6	22787750	22787750	11	1191424	1299964
6	17809480	17809766	11	3276666	3312212
6	10628106	10628106	12	22888917	22888917
6	23968835	23975076	13	773136	788393
6	14946152	15121186	13	10186610	10256102
6	10901693	10901693	15	12132878	12132878
6	19430127	19433941	15	21953073	21953073
6	14858510	14861490	18	17411098	17516434
6	15637418	15647097	18	23600842	23672833
6	18739541	18746772	19	14295361	14302158
6	14858510	14858510	19	20415847	20415847
6	22769725	22787750	20	6085587	6100039
6	17499052	17559524	20	12369528	12369528
6	10831540	11052343	21	378980	1634470
6	10665425	10665425	22	1444345	1897489
6	14442026	14442026	22	13934676	13934676
7	4589003	4904351	9	23190458	23249493
7	15669875	15679406	10	6453315	6465262
7	13551827	13553526	10	10491496	10491496
7	13540528	13553526	11	1433236	1469464
7	4682291	17514511	11	10994373	25086509
7	4589003	4589003	12	9093822	9094239
7	15025330	15114968	12	14363321	14413675
7	15339228	15368356	13	21678702	21697683
7	26632648	26674614	13	22492778	22500991
7	15875895	15875895	14	288883	288883
7	15813957	15875895	15	10465666	10509594
7	17467711	17514511	15	12132878	12132878
7	4589003	15368356	15	21942895	22802280
7	13324512	13409853	18	10152593	10157519
7	5018180	5018180	18	16520491	16521697
7	7909537	7909537	19	11998975	11998975
7	16154984	16156994	19	14728864	14811917
7	7920471	7958170	19	25099228	25100387
7	7909537	7958170	20	19029275	19029275
7	15020570	17514511	20	26767765	26816533
7	13460390	13527337	24	5034235	5145263
8	23350943	23554469	9	1133865	2368569
8	14227310	14235522	9	2826444	2826636
8	10091645	10318590	10	4478091	4567381
8	10350629	14235522	10	10561476	16847728
8	10153722	10361623	11	2970487	21825671
8	10530977	10551307	13	7590601	7590601
8	10318590	10361623	13	11609267	11609267
8	10321613	10361623	14	11364925	11378468
8	13480564	13519345	14	15361743	15364822
8	10539349	12774671	15	16970909	22812942
8	10350629	15447126	16	14481980	14825511
8	23366883	23424573	18	13914266	13916581
8	10309436	10895228	18	17411098	26397164
8	14172092	14172092	20	27695025	27695025
8	13439398	13446555	22	9507567	9512884
8	10091267	12748274	22	13970291	14127266
8	11157227	11173118	23	24991434	24991434
8	10144267	10915008	24	5144017	5227319
9	14474306	14483264	10	4478091	4485970
9	10668253	10668253	10	11215425	11216555
9	23218530	23274664	10	16165881	16183370
9	11104847	11106198	11	1471239	1471239
9	9432419	9436826	12	3047636	3081089
9	3512056	3533129	12	13508486	13519715
9	15247222	15253199	12	14904124	14904124
9	27076697	27216940	12	16905525	16932710
9	2826444	2921761	12	21586204	21891045
9	3629933	3631371	13	1796315	1796315
9	23189030	23274664	13	21653101	21697683
9	26063036	26079779	14	10092221	10112623
9	12455760	12606088	15	20797030	22019805
9	2826444	2868419	15	22515923	22519412
9	11621783	11693616	15	22707007	22722728
9	12690984	12703222	17	2261043	2261043
9	3450012	20405517	18	13798022	18231441
9	11613979	11620616	18	25916763	25918767
9	9432419	9436826	18	26166107	26169195
9	12641548	12641548	18	31739348	31739348
9	3449644	3533129	19	15904018	15980138
9	28017262	28037013	19	16208822	16228638
9	3629933	3631371	20	16248070	16248070
9	12672595	16514457	21	90370	1634470
9	3510713	3533129	22	1607517	1623448
9	18094049	18116344	22	9386063	9408176
9	3449644	3453723	23	1058819	1216814
10	11329266	11333784	11	3245244	3274594
10	14207999	14207999	12	16929841	16929841
10	3819799	3825737	17	407770	442789
10	16794539	16847728	17	2024225	2272099
10	11502536	11502536	21	1042069	1048183
10	10506582	10558926	21	4619148	4631662
10	15397838	15414041	22	1587957	1623448
10	25349165	25349165	22	8950660	8958873
10	16794539	16806313	23	14084538	14163515
11	611962	25386423	12	3076611	8475870
11	11487713	11493754	12	12276878	12282160
11	1104677	26826712	12	13268382	13754062
11	3245244	20578812	12	22020426	22684489
11	11546908	11548704	13	2165006	2165179
11	1335727	1345243	13	21697683	21697683
11	1466099	1469464	14	3709192	3712892
11	3251658	25830675	15	21942895	22742130
11	203080	3281520	17	1885375	2272099
11	21809657	21822189	18	9313857	9317763
11	661982	25386423	18	25405866	26169195
11	12925626	13216539	19	8884026	9213034
11	1537758	1565245	19	15904018	15980138
11	1191424	13586421	20	12369528	16404973
11	13319949	13321524	21	93551	236381
11	21809657	21828111	21	540806	542317
11	25386423	25868906	22	9002385	13812692
11	1191424	13555033	22	14406707	26678379
11	15292019	15292019	23	13992342	13992342
11	22062838	22079106	23	24870945	24882320
12	16760118	16760118	13	21400569	21409314
12	7222848	7232689	13	21697683	21697683
12	5052382	22458119	15	22094317	22742130
12	3050266	3139518	16	14498334	14568682
12	22352097	22361989	16	23329872	23329872
12	7137037	17359073	17	1885375	2272099
12	19338201	19341109	18	16935942	16955353
12	21773444	21788944	18	18251384	18252793
12	3047636	3135044	19	16944905	16945525
12	3047636	25626373	20	13161199	16287880
12	7118539	22086298	21	276839	542317
12	13779103	22666198	22	1444345	26678379
12	8465398	8479257	23	4196335	4196335
12	7264186	7266462	23	17857536	17860268
13	21485004	24270423	14	3708085	3733021
13	21485004	22520694	15	20797030	22291461
13	42307	1320652	15	22688770	22722728
13	10247124	10280438	17	2024225	2187387
13	7590601	22559849	18	17413626	26251701
13	21485004	25227803	21	90370	1634470
13	1579925	1582080	23	20793214	20793214
13	21501641	21697683	23	24856644	24875945
13	1717774	7389367	24	5034235	5124785
14	3708085	3789169	15	14723541	22707007
14	3728685	3733021	18	26157481	26348861
14	10130064	10130064	20	27458530	27815038
14	11364925	11366639	22	9004558	9004558
14	9547538	15336200	23	93776	161597
15	16949183	20798724	16	7370063	14986397
15	626877	724378	18	4738289	4754122
15	16949183	22818557	18	13059888	26098779
15	22294118	22294480	18	31165412	31165412
15	14649857	14651563	19	477159	477159
15	16949183	16994111	19	7593624	7620913
15	1665935	1694107	19	10891094	10966120
15	21994040	22010375	19	16226776	16228638
15	1665935	1665935	20	26879386	26879386
15	21944013	22332596	22	20820840	26678379
15	22067487	22087763	23	14062631	21748997
15	22782769	22782769	23	23075450	23087258
15	12237393	22094317	23	24870945	24958507
15	12132878	22294480	24	5035277	5227319
16	15209233	16189020	17	1888079	1944813
16	15116423	15117184	18	14860441	14860441
16	23447870	23449159	18	31830953	31960823
16	23207721	23207721	19	8884026	8957951
16	14822260	14825511	20	12409595	12418015
16	23481272	23481272	22	9021293	9021293
16	24495144	24683219	23	874496	944250
17	2024225	2122614	19	7593624	7600574
17	2105738	2187387	20	15690742	15692886
17	1888079	1891121	23	21750224	21752979
18	19955068	26172641	19	8884026	12027308
18	2284236	17314949	20	14330859	15453426
18	13789155	13789155	21	1634470	1634470
18	17282642	26172641	22	1822344	9315649
18	17459698	17516434	23	994534	1289701
18	2532009	3709619	23	2472359	2550101
18	26087854	26098779	23	4427404	4429132
18	31197030	31197030	23	14156413	14160513
19	16944905	16945525	20	13161199	13196332
19	14865978	14911534	20	16816268	16834221
19	7593624	7620913	20	26879386	26899995
19	9118269	9240773	22	1444345	1478270
19	11217652	11307443	22	2869028	2890178
19	12321021	12375504	22	13931721	13939080
19	12015123	12027308	23	21705032	21751337
19	24615739	24626858	24	5119424	5125883
20	17098331	19184988	21	1634470	1634470
20	15336141	15351928	21	4535148	4535148
20	26851694	26872113	22	8795122	8843923
20	13161199	16248070	22	14055453	14127266
20	16280299	16403312	23	295771	14853912
21	12572253	12597080	24	5291894	5293994
22	14389316	14404276	23	14820731	14853912

## Sheet: Table S1B
Table S1B. Pairs of LD regions (FDR 5%) that have single-gene resolution. The Human Genome Organization gene name for the gene contained in each of these regions is listed.
Region 1	Gene 1	Region 2	Gene 2
1:15086760_15125971	ERC2	11:1544498_1559761	PITX1
1:14504941_14506872	NAV1	17:9221233_9222588	CDPF1
4:8314011_8328433	SENP8	9:3449644_3453723	DTYMK
4:1672192_1680173	AP2A2	13:11650338_11723739	STMN1
5:24843831_24844314	KPNA2	8:13436390_13448570	UNC5C
5:10783094_10784166	GRIN2B	15:20797030_20815009	ENAH
7:15339228_15368356	FIGN	13:21678702_21697683	STMN1
11:1466099_1469464	SEC24A	14:3709192_3712892	PVRL4
11:22062838_22079106	RABEP1	23:24870945_24882320	GPC3
12:19338201_19341109	IKBKB	18:16935942_16955353	SCN4B
16:14822260_14825511	RSAD1	20:12409595_12418015	protein_coding
19:7593624_7620913	protein_coding	20:26879386_26899995	RIMS4
19:12321021_12375504	DAAM2	22:13931721_13939080	HPSE2

## Sheet: Table S1C
Table S1C. Sites in the LD dataset had a significantly greater proportion of divergent sites between X. birchmanni and X. malinche and synonymous substitutions compared to randomly sampled sites from the genomic background, even when pairs that had heterospecific associations in one or both populations were included. P-values determined by resampling the genomic background.
Mutation type	Median divergence Genomic Background	Median divergence (FDR 5%)
All sites	0.004	0.0044 (p<0.001)
Nonsynonymous	0.0004	0.0005 (p=0.13)
Synonymous	0.004	0.0044 (p<1e-4)
